# Supplementary material for: Llama immunization with full-length VAR2CSA generates cross-reactive and inhibitory single-domain antibodies against the DBL1X domain
Source: PubMed Central journal article supplement — Sci Rep. 2014 Dec 9;4:7373. doi: 10.1038/srep07373 (PMC5376981; doi:10.1038/srep07373), 2014-12-09
Supplement: srep07373-s1.pdf [file srep07373-s1.pdf]

**Llama immunization with full-length VAR2CSA generates cross-reactive and inhibitory single-domain antibodies against the DBL1X domain**

Sofia Nunes-Silva<sup>a,b,c,d</sup>, Stéphane Gangnard<sup>a,b,c,d</sup>, Marta Vidal<sup>a,b,c,d</sup>, Anneleen Vuchelen<sup>e,f</sup>, Sebastien Dechavanne<sup>a,b,c,d</sup>, Sherwin Chan<sup>g</sup>, Els Pardon<sup>e,f</sup>, Jan Steyaert<sup>e,f</sup>, Stephanie Ramboarina<sup>e,f</sup>, Arnaud Chêne<sup>a,b,c,d</sup> and Benoît Gamain<sup>a,b,c,d,\*</sup>.

Inserm UMR\_1134, Paris, France<sup>a</sup>; Université Paris Diderot, Sorbonne Paris Cité, UMR\_S1134 Paris, France<sup>b</sup>; Institut National de la Transfusion Sanguine, Paris, France<sup>c</sup>; Laboratory of excellence GR-Ex, Paris, France<sup>d</sup>; VIB, Structural Biology Research Center, Brussels, Belgium<sup>e</sup>, Structural Biology Brussels, Vrije Universiteit Brussel, Belgium<sup>f</sup>, Department of Microbiology, Tumor and Cell Biology, Karolinska Institutet, Stockholm, Sweden<sup>g</sup>.

\*Corresponding author:

Benoît Gamain

UMR\_S1134

Institut National de la Transfusion Sanguine

6 rue Alexandre Cabanel, 75015 Paris, France

Tel: +33 (0) 1 44 49 30 01

Fax: +33 (0) 1 43 06 50 19

E-mail: benoit.gamain@inserm.fr

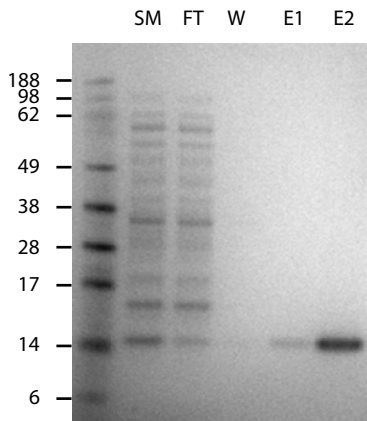

**Supplementary Figure S1. Nanobody expression and purification.** The coomassie blue stained gel contains the starting material (SM) of the IMAC purification (corresponding to the periplasmic extract from harvested bacteria), flow-through (FT), wash (W) and eluted fractions (E1 and E2) for the VHH905.

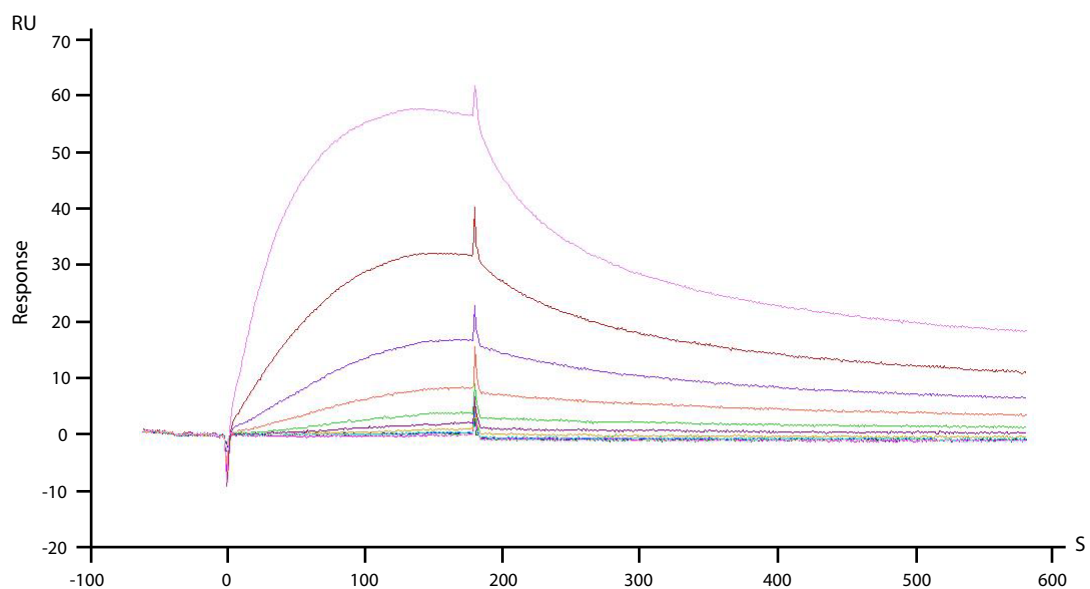

**Supplementary Figure S2. Sensorgram showing interaction of VHH867 with VAR2CSA.** Full-length recombinant VAR2CSA (3D7-DBL1X-6ε) was immobilized on the chip and nanobodies were injected at 10 different concentrations from 1  $\mu$ M to 1.95 nM, as indicated above some of the corresponding curves.
